1 **Integrated Collection of Stem Cell Bank data, a**  
2 **data portal for standardized stem cell information**

3

4 **Authors**

5 Ying Chen<sup>1</sup>, Kunie Sakurai<sup>1†</sup>, Sumihiro Maeda<sup>2</sup>, Tohru Masui<sup>3</sup>, Hideyuki Okano<sup>2</sup>,

6 Johannes Dewender<sup>4</sup>, Stefanie Seltsmann<sup>4</sup>, Andreas Kurtz<sup>4</sup>, Hiroshi Masuya<sup>5</sup>, Yukio

7 Nakamura<sup>6</sup>, Michael Sheldon<sup>7</sup>, Juliane Schneider<sup>8</sup>, Glyn N. Stacey<sup>9,10,11</sup>, Yulia Panina<sup>1</sup>,

8 and Wataru Fujibuchi<sup>1,\*</sup>

9

10 **Affiliations**

11 <sup>1</sup> Center for iPS Cell Research and Application (CiRA), Kyoto University, 53

12 Kawahara-cho, Sho-goin, Sakyo-ku, Kyoto 606-8507, Japan

13 <sup>2</sup> Department of Physiology, Keio University School of Medicine, Tokyo 160-8582,

14 Japan

15 <sup>3</sup> National Center for Medical Genetics, Keio University School of Medicine, Tokyo

16 160-8582, Japan

17 <sup>4</sup> BIH Center for Regenerative Therapies (BCRT), Charité – Universitätsmedizin Berlin,

18 Augustenburger Platz 1, 13353 Berlin, Germany

19 <sup>5</sup> Integrated Bioresource Information Division, RIKEN BioResource Research Center,

20 Tsukuba, Ibaraki 305-0074, Japan

21 <sup>6</sup> Cell Engineering Division, RIKEN BioResource Research Center, Tsukuba, Ibaraki

22 305-0074, Japan

23 <sup>7</sup> Department of Genetics and Human Genetics Institute of New Jersey, Rutgers, The

24 State University of New Jersey, Piscataway, New Jersey 08854, U.S.A.

25 <sup>8</sup> Harvard Catalyst | Clinical and Translational Science Center, Boston, Massachusetts

26 02215, U.S.A.

27 <sup>9</sup> International Stem Cell Banking Initiative, 2 High Street, Barley, Herts, SG88HZ, UK

28 <sup>10</sup> National Stem Cell Resource Centre, Institute of Zoology, Chinese Academy of

29 Sciences, Beijing 100190, China

30 <sup>11</sup> Innovation Academy for Stem Cell and Regeneration, Chinese Academy of Sciences,

31 Beijing 100101, China

32

33 **Additional Footnotes**

34 † Present address: Department of Cellular Biology and Pharmacology, Florida

35 International University, Herbert Wertheim College of Medicine, Florida 33199, U.S.A.

36

37 **Contact**

38 Wataru Fujibuchi\*

39 Address: Center for iPS Cell Research and Application (CiRA), Kyoto University, 53

40 Kawahara-cho, Sho-goin, Sakyo-ku, Kyoto 606-8507, Japan

41 E-mail: [fujibuchi-g@cira.kyoto-u.ac.jp](mailto:fujibuchi-g@cira.kyoto-u.ac.jp)

42 Tel: +81-75-366-7012

43

## 44 **SUMMARY**

45 The last decade has witnessed an extremely rapid increase in the number of newly  
46 established stem cell lines worldwide. However, due to the lack of a standardized  
47 format, data exchange among stem cell line information resources has been challenging,  
48 and no system can search all stem cell lines across resources worldwide. To solve this  
49 problem, we have developed the Integrated Collection of Stem Cell Bank data (ICSCB)  
50 (<http://icscb.stemcellinformatics.org/>), a new and largest database search portal for stem  
51 cell line data from various resources, based on the standardized data items and terms of  
52 the MIACARM framework. Currently, ICSCB can retrieve 15,796 cell lines from four  
53 major data resources in Europe, Japan, and the U.S. ICSCB is automatically updated to  
54 provide the latest cell line information, and its integrative search engine helps users  
55 collect cell line information from donors with rare diseases worldwide, which has been  
56 a formidable task, thereby distinguishing itself from other database search portals.

57

## 58 INTRODUCTION

59 Since the first report of human induced pluripotent stem cells (iPSCs) (Takahashi et al.,  
60 2007), there has been a rapid rise in the number of iPSC lines and related information  
61 worldwide (Table 1). This remarkable growth has not only accelerated studies of  
62 regenerative medicine but also provided opportunities to understand such pragmatic  
63 issues as the quality of pluripotent stem cells (Nishizawa et al., 2016) and the disease  
64 mechanisms (Sasaki et al., 2016). Stem cell banks and registries are expected to provide  
65 necessary data of individual stem cell lines. However, the exchange of data among  
66 different institutions is not a trivial matter, and scientific reproducibility based on  
67 available information is problematic for both basic studies and clinical applications  
68 (Yaffe et al., 2016; Isasi and Knoppers, 2011; Thirumala et al., 2009). Moreover, as  
69 technologies for the characterization of cell lines continue to progress, the addition of  
70 new quality standards as necessary data items is complicating and diversifying data  
71 formats among different stem cell banks and registries (Hug, 2009; Knoppers and Isasi,  
72 2010). As an attempt to solve these problems, we previously reported MIACARM  
73 (Minimum Information About a Cellular Assay for Regenerative Medicine) guidelines in

74 2016 ([Sakurai et al., 2016](#)), which proposed the utilization of standardized data items and  
75 formats for all stem cell lines in regenerative medicine. Presently, MIACARM contains  
76 258 items, covering such areas as stem cell production and materials (e.g., donor  
77 information, source cell information, and cell culture medium and substrate information),  
78 cell banking processes, cell characterization, sterility testing, and even ethical concerns.  
79 Later, a standardized nomenclature for pluripotent stem cells was introduced in 2018 with  
80 unification of cell line codification and minimization of information loss and confusion  
81 regarding cell lines as goals ([Kurtz et al., 2018](#)). Nevertheless, with the growing number  
82 of registered cell lines, existing data deposition formats have made it increasingly harder  
83 for not only data depositors but also users to seek and obtain cell lines collected under  
84 different projects, disease status, and privacy issues ([Godard et al., 2003](#); [Winickoff et al.,](#)  
85 [2009](#)).

86           In this paper, as our next step towards the unification and utilization of stem  
87 cell line data in the world, we report our new database portal, Integrated Collection of  
88 Stem Cell Bank data (ICSCB), which was designed using MIACARM guideline items  
89 and formats. The main objectives of ICSCB are i) to establish an integrated stem cell

90 database portal that can cover the majority of stem cell resources in the world, and ii) to  
91 offer users minimum but efficient access to information on stem cell lines based on  
92 MIACARM guidelines. Currently, ICSCB provides data of more than 15,000 stem cell  
93 lines registered in four major stem cell line databases: hPSCreg ([Seltmann et al., 2015](#)),  
94 SKIP ([Kim et al., 2017](#)), RIKEN BRC ([Kobayashi et al., 2016](#)), and eagle-i ([Vasilevsky et](#)  
95 [al., 2012](#)). ICSCB has a user-friendly search engine for stem cell lines and can be  
96 accessed directly at <http://icscb.stemcellinformatics.org/>, or as a slim version by  
97 removing cell line redundancy as much as possible through the SHOGoiN (Human  
98 Omics Database for the Generation of iPS and Normal Cells) homepage at  
99 <http://shogoin.stemcellinformatics.org/>.

100

## 101 **RESULTS AND DISCUSSION**

### 102 **Web interface**

103 ICSCB was designed for researchers searching for available cell lines to conduct various  
104 studies, such as regenerative medicine and disease analysis. Covering as many diverse  
105 cell lines as possible was the first priority when deciding which resources to include in

106 ICSCB. Sharing cell line information between different stem cell banks and registries is  
107 problematic due to different cell naming methods, different policies on cell assessment in  
108 different registries, unclear data sources, and so on. ICSCB is a collection of cell lines  
109 from four major and reliable cell line data resources based in Europe, Japan, and the  
110 United States. ICSCB updating is regularly performed for new SKIP and eagle-i stem cell  
111 line data as well as automatically performed for hPSCreg and RIKEN BRC data in a  
112 synchronized manner. Users can retrieve all related stem cell line information by using a  
113 free text search. Detailed information for a specific cell line can be accessed by clicking  
114 on the stem cell ID, which is linked to the information page in the original resources  
115 (**Figure 1**). The results can be further filtered according to users' requests. There may be  
116 several records for the same cell line if the cell line is included in multiple data resources.  
117 To provide users as much information as possible, the results page is designed to show  
118 cell lines with matching cell names as well as close descriptions.

119

120 **Data coverage**



121 ICSCB covers more data than any other stem cell line repository available. The  
122 integration of all major data resources allows us to check the current state of stem cell  
123 research in the world (**Figure 2**). Although we recognize redundancies in the data,  
124 according to our statistics, the number of iPSC lines constitutes more than 80% of all cell  
125 lines and the ratio of healthy to diseased donors is approximately 3 to 2 (**Figure 2A,B**).  
126 The total number of countries from which cell lines can be retrieved is 36 (as of March  
127 26, 2020), of which the top 9 countries identified in SKIP and hPSCreg are (in descending  
128 order) the United Kingdom, United States, Japan, Germany, China, Spain, Sweden,  
129 Denmark, and Italy (**Figure 2C**). In addition, as the recent number of iPSC lines  
130 generated from patient donors is growing, ICSCB supports disease-oriented search to  
131 help users find all disease-related stem cell lines by using disease names. The distribution  
132 of disease and disorder types is shown in **Figure 2D**.

133

#### 134 **Easy search interface on SHOGoiN homepage**

135 ICSCB also has a quick and easy search module on the SHOGoiN homepage  
136 (<https://stemcellinformatics.org/>). SHOGoiN is a repository for accumulating and

137 integrating diverse human cell information to support a wide range of research using  
138 cell-related data. The database consists of several modules that store cell lineage maps,  
139 transcriptomes, methylomes, cell conversions, cell type markers, and cell images with  
140 morphology data curated from public as well as contracted resources based on  
141 sophisticated cell taxonomy. Collaboration between ICSCB and SHOGoiN makes it  
142 possible for users to directly use free text searches for stem cell line data on the  
143 SHOGoiN homepage. The ICSCB easy search module in SHOGoiN supports a  
144 simplified ICSCB search with keywords, and the advanced search is designed to redirect  
145 users to the ICSCB homepage with full functions. Results from the SHOGoiN  
146 homepage share the same structure with the ICSCB homepage.

147

#### 148 **Concluding remarks and future plan**

149 So far, the registration and submission of newly established cell lines have been  
150 complicated by the lack of standardized data formats. Most data registries are currently  
151 limited by respective domestic policies and have adopted their information structures and  
152 validation processes independently ([Andrews et al., 2015](#); [Zarzeczny et al., 2009](#)). The

153 lack of standardized data formats has caused problems for researchers who must usually  
154 search several websites to find the stem cell lines they are looking for (Wells et al., 2013).  
155 In the present work, we developed ICSCB, an integrated data distribution system that  
156 provides stem cell line information from major stem cell banks and registries all over the  
157 world. ICSCB adopts a standardized information format based on the “Source Cell”  
158 module of MIACARM to integrate different data resources while keeping important  
159 information.

160           In the future, in order to respond to the rapid growth in the number of stem cell  
161 lines, we will include more data resources in ICSCB, including the Taiwan Human  
162 Disease iPSC Service Consortium and other recently developed stem cell banks, to make  
163 ICSCB more resource-abundant and usable. We also plan to add a detailed quality check  
164 to help users find stem cell lines of high quality. As the largest stem cell line information  
165 resource, we will support stem cell communities by improving the quality and increasing  
166 the scale of our database.

167

## 168 **EXPERIMENTAL PROCEDURES**

169 **Data resources**

170 ICSCB resources were selected from existing major stem cell registries that collect cell  
171 line information in Europe, Japan, and the U.S., and stem cell banks that provide cell lines  
172 with information of the attributes. We checked the number of registered cell lines and the  
173 criteria for registration in these registries and banks to decide to what extent their cell line  
174 data can fulfill MIACARM guidelines for inclusion in ICSCB. Considering the size,  
175 accessibility, and diversity of the different databases, three stem cell registries and one  
176 stem cell bank were included: (1) SKIP (5,615 cell lines), (2) hPSCreg (3,099 cell lines),  
177 (3) RIKEN BRC (3,534 cell lines), and (4) eagle-i (3,548 cell lines) (as of March 26,  
178 2020). These data resources were selected because they had the highest number of  
179 registered cell lines and large diversity, which would provide a good regional balance of  
180 cell sources to reduce redundancies in cell line entries. RIKEN BRC basically collected  
181 cell lines from Japanese institutions, SKIP contained data mostly from other Japanese and  
182 Asian institutions, hPSCreg collected data mainly from European institutions, and eagle-i  
183 collected data mostly from the United States. Details of the data sources are listed in

184 **Figure 3.**

185

186 **Data integration**

187 Since our previous research on the listed stem cell banks ([Sakurai et al., 2016](#)), the  
188 number of registered cell lines had skyrocketed from 1,483 to approximately 8,000 in the  
189 past three years. As a result, stem cell registries are facing the demand to collect  
190 information on the rapidly increasing number of new cell lines and register the cell lines  
191 into their databases as quickly as possible. However, because the stem cell banks and  
192 registries are using their own formats for data entry, the integration of the data into a  
193 centralized collection system is an extraordinary challenge. To solve this problem, we  
194 used a decentralized or distributed database system ([Fujibuchi et al., 1998](#)) by adopting  
195 items of different database formats into 12 attributes, or terms, from three MIACARM  
196 modules: stem cell general identification, donor identification, and source cell  
197 identification (**Table 2**). To practically integrate the data from the four data resources  
198 (SKIP, hPSCreg, RIKEN BRC, and eagle-i), we adopted a mechanism of cross-reference  
199 tables that allow users to conduct a search using MIACARM terms that are translated into  
200 the corresponding terms in the individual data resources to implement the search. For

201 example, the term “Stem cell ID” in MIACARM was translated into the terms “stem cell  
202 id” (hPSCreg), “stem cell id” (SKIP), “CellID” (RIKEN BRC), and “cell line label”  
203 (eagle-i) for the search implementation. Thus, ICSCB submits search requests to each  
204 data resource with its own (translated) terms and integrates all retrieved results by  
205 common MIACARM terms, thereby achieving a standardized data format at the level of  
206 display (**Figure 4**).

207

#### 208 **ICSCB workflow and search engine updating**

209 In order to provide fast and easy access to the latest and accurate cell line information, we  
210 built an automatic updating system that adds newly released cell lines to ICSCB as soon  
211 as they become available in any of the four data resources. Data from eagle-i and SKIP  
212 are directly collected and stored in the MySQL database with the terms required for the  
213 MIACARM modules. Data from hPSCreg and RIKEN BRC are collected on the fly per  
214 request using a web application programming interface (API) provided by the respective  
215 sites. RIKEN BRC also uses SPARQL language for data retrieval requests ([Kim et al.,  
216 2017](#); [Kobayashi et al., 2016](#)).

217           To simplify the search process, ICSCB provides an easy-to-use and  
218 mobile-friendly web application. The goal of the application is to help users find the  
219 desired stem cell lines as quickly as possible. The interface of the search engine is  
220 designed with the 12 MIACARM terms (**Table 2**) except the term “Stem cell ID”. Users  
221 receive result pages with all the matching results listed in a table that includes all the basic  
222 attributes under the structure of MIACARM. To ensure a more specific search with a  
223 wide variety of attributes, ICSCB is designed to accommodate searches not only by  
224 standardized terms from MIACARM but also by terms specific to each of the four data  
225 resources, such as “age” or “country” (**Figure 5A**). When user queries are submitted,  
226 ICSCB simultaneously retrieves MIACARM standardized data and resource-specific  
227 data so as not to miss any relevant entries. If a keyword entered by a user in a general  
228 keyword search does not exist in MIACARM terms but is included in data specific to any  
229 of the four data resources, the user will get detailed descriptions of the matching data in  
230 the results page. For example, even if the standardized MIACARM terms do not contain  
231 “transgene”, it is still possible to enter a gene name into the keyword field (e.g., Sox2)  
232 such that the results page will display relevant entries by showing the indicated keyword

233 in the extra field below (**Figure 5B**). Furthermore, the user can filter the results by data  
234 resource and detailed keywords from “Searching options” box inside the results page to  
235 narrow down the results list. In addition, all the results can be easily downloaded as a  
236 table directly from the results page.

237 In addition, ICSCB provides a quality control panel based on MIACARM,  
238 supporting customized searches according to quality control results. At present, assays  
239 for teratoma formation, differentiation ability in vitro, morphology data, marker gene  
240 expression/surface antigen expression data, karyotyping assay results, copy number  
241 variation, residual exogene detection results, genome profiling, transcriptome profiling,  
242 and epigenome profiling data are accessible from ICSCB.

243

244



245 **SUPPLEMENTAL INFORMATION**

246 Supplemental Information includes Supplemental Experimental Procedures, three  
247 figures, and five tables, and can be found with this article online at:

248

249 **AUTHOR CONTRIBUTIONS**

250 YC and YP drafted the manuscript. SM, TM, HO, JD, SS, AK, HM, YN, MS, JS, and  
251 WF provided and facilitated the stem cell data. WF conceptualized the research. AK,  
252 GS, and WF led the project.

253

254 **ACKNOWLEDGEMENTS**

255 The authors deeply appreciate Dr. Peter Karagiannis for kindly reviewing the  
256 manuscript. This work was partially supported by the Core Center for iPS Cell  
257 Research, Research Center Network for Realization of Regenerative Medicine  
258 (16bm0104001h0004), and the Formulation of Regenerative Medicine National  
259 Consortium which Renders Nation-wide Assistance to Clinical Researches, Project to  
260 Build Foundation for Promoting Clinical Research of Regenerative Medicine

261 (19bk0204001h0004, 19bk0204001s0104), Japan Agency for Medical Research and  
262 Development, AMED, and German Academic Exchange Service (DAAD) PPP grant.

263

## 264 **COMPETING INTERESTS**

265 H.O. is a founding scientist of SanBio Co., Ltd. and K Pharma Inc.

266

267

## 268 **REFERENCES**

269 Andrews, P.W., Baker, D., Benvenisty, N., Miranda, B., Bruce, K., Brüstle, O., Choi, M.,

270 Choi, Y.-M., Crook, J.M., Dvorak, P. (2015). Points to consider in the development of

271 seed stocks of pluripotent stem cells for clinical applications: International Stem Cell

272 Banking Initiative (ISCBI). *Regen. Med.* *10*, 1–44.

273

274 Fujibuchi, W., Goto, S., Migimatsu, H., Uchiyama, I., Ogiwara, A., Akiyama, Y.,

275 Kanehisa, M. (1998). DBGET/LinkDB: an integrated database retrieval system. In *Pac.*

276 *Symp. Biocomput.* *98*, 683–694.

277 Godard, B., Schmidtke, J., Cassiman, J.J., Aymé, S. (2003). Data storage and DNA  
278 banking for biomedical research: informed consent, confidentiality, quality issues,  
279 ownership, return of benefits. A professional perspective. *Eur. J. Hum. Genet.* *11*, S88–  
280 S122  
281  
282 Hug, K. Banks, repositories and registries of stem cell lines in Europe: regulatory and  
283 ethical aspects. *Stem Cell Rev. Rep.* *5*, 18–35.  
284  
285 Isasi, R., and Knoppers B.M. (2011). From banking to international governance:  
286 fostering innovation in stem cell research. *Stem cells Int.* 2011, 498132.  
287  
288 Kim, J.H., Kurtz, A., Yuan, B.Z., Zeng, F., Lomax, G., Loring, J.F., Crook, J., Ju, J.H.,  
289 Clarke, L., Inamdar, M.S., et al. (2017). Report of the International Stem Cell Banking  
290 Initiative workshop activity: current hurdles and progress in seed-stock banking of  
291 human pluripotent stem cells. *Stem Cells Transl. Med.* *6*, 1956–1962.

292 Knoppers, B.M., and Isasi, R. (2010). Stem cell banking: between traceability and  
293 identifiability. *Genome Med.* 2, 73  
294  
295 Kobayashi, N., Lenz, K., and Masuya, H. (2016). RIKEN MetaDatabase: a database  
296 platform as a microcosm of linked open data cloud in the life sciences. In *Joint*  
297 *International Semantic Technology Conference*. (Springer, Cham), pp. 99–115.  
298  
299 Kurtz, A., Seltmann, S., Bairoch, A., Bittner, M.S., Bruce, K., Capes-Davis, A.,  
300 Laurence, D., Johannes, D., et al. (2018). A standard nomenclature for referencing and  
301 authentication of pluripotent stem cells. *Stem Cell Rep.* 10, 1–6.  
302  
303 Nishizawa, M., Chonabayashi, K., Nomura, M., Tanaka, A., Nakamura, M., Inagaki, A.,  
304 Nishikawa, M., Takei, I., Oishi, A., Tanabe, K., et al. (2016). Epigenetic variation  
305 between human induced pluripotent stem cell lines is an indicator of differentiation  
306 capacity. *Cell Stem Cell* 19, 341–354.

307 Sakurai, K., Kurtz, A., Stacey, G., Sheldon, M., and Fujibuchi, W. (2016). First proposal  
308 of minimum information about a cellular assay for regenerative medicine. *Stem Cells*  
309 *Transl. Med.* 5, 1345–1361.

310

311 Sasaki, K., Makiyama, T., Yoshida, Y., Wuriyanghai, Y., Kamakura, T., Nishiuchi, S.,  
312 Hayano, M., Harita, T., Yamamoto, Y., Hirose, S., et al. (2016). Patient-specific human  
313 induced pluripotent stem cell model assessed with electrical pacing validates S107 as a  
314 potential therapeutic agent for catecholaminergic polymorphic ventricular tachycardia.  
315 *PLoS One* 11. e0164795.

316

317 Seltmann, S., Lekschas, F., Müller, R., Stachelscheid, H., Bittner, M.S., Zhang, W.,  
318 Luam, K., Anna, S., Anna, V., Stacey, G.N., et al. (2015). hPSCreg—the human  
319 pluripotent stem cell registry. *Nucleic Acids Res.* 44, D757–D763.

320

321 Takahashi, K., Tanabe, K., Ohnuki, M., Narita, M., Ichisaka, T., Tomoda, K., and  
322 Yamanaka, S. (2007). Induction of pluripotent stem cells from adult human fibroblasts by  
323 defined factors. *Cell* *31*, 861–872.

324

325 Thirumala, S., Goebel, W.S., Woods, E.J. (2009). Clinical grade adult stem cell banking.  
326 *Organogenesis* *5*, 143–154.

327

328 Vasilevsky, N., Johnson, T., Corday, K., Torniai, C., Brush, M., Segerdell, E., Wilson,  
329 M., Shaffer, C., Robinson, D., Haendel, M. (2012). Research resources: curating the  
330 new eagle-i discovery system. *Database* *2012*, bar067.

331

332 Wells, C.A., Mosbergen, R., Korn, O., Choi, J., Seidenman, N., Matigian, N.A., Vitale,  
333 A.M., Shepherd, J. (2013). Stemformatics: visualisation and sharing of stem cell gene  
334 expression. *Stem Cell Res.* *10*, 387–395.

335 Winickoff, D.E., Saha, K., Graff, G.D. (2009). Opening stem cell research and  
336 development: A policy proposal for the management of data, intellectual property, and  
337 ethics. *Yale J. Health Pol’y, L. & Ethics* 9, 52–127.

338

339 Yaffe, M.P., Noggle, S.A., and Solomon, S.L. (2016). Raising the standards of stem cell  
340 line quality. *Nat. Cell Biol.* 18, 236.

341

342 Zarzeczny, A., Scott, C., Hyun, I., Bennett, J., Chandler, J., Chargé, S., Heine, H., Isasi,  
343 R., Kato, K., Lovell-Badge, R., et al. (2009). iPS cells: mapping the policy issues. *Cell*,  
344 139, 1032–1037.

345

## 346 **FIGURE LEGENDS**

### 347 **Fig. 1: Web interface of ICSCB.**

348 (A) The ICSCB search page. Any keyword related to cell lines (including cell line name,  
349 disease name, gender, and so on) can be used to perform an instant search. (B) The  
350 ICSCB results page. Matched or partially matched cell lines are listed according to  
351 MIACARM terms. To check the details of the cell lines, the user can click on the stem cell  
352 ID, which is linked to the original source of cell line information.

353

### 354 **Fig 2. Details of cell lines collected by ICSCB.**

355 Cell line information is categorized as (A) stem cell type, (B) health/disease status of  
356 donor, (C) country that established the cell lines, and (D) disease category.

357

### 358 **Fig. 3: Overview of ICSCB.**

359 ICSCB includes data from three stem cell registries and one cell bank in order to  
360 maximize data coverage worldwide.

361



362 **Fig. 4: Workflow of ICSCB data integration.**

363 The SKIP and eagle-i databases were fully replicated from websites and imported to  
364 MySQL (even when updating ICSCB), whereas hPSCreg and RIKEN BRC used a web  
365 API and SPARQL for data collection. Cross-reference tables (Table 3) were used when  
366 ICSCB integrated and standardized cell line data.

367

368 **Fig. 5: Keyword search is automatically extended to all terms provided by the four**  
369 **data resources even if a keyword is not included in standardized MIACARM**  
370 **terms.**

371 (A) Terms specific to each of the four data resources. (B) Even if the standardized  
372 MIACARM terms do not contain, for example, “transgene”, it is still possible to enter a  
373 gene name into the keyword field (e.g., Sox2), which will lead users to results from the  
374 four data resources with relevant information. The results of the match will be shown in  
375 another row below the standardized fields.

Searching fields (15796 cell lines)

Keyword

Data source  All  SKIP ( 5615 )  RIKEN BRC ( 3534 )  eagle-i( 3548 )  hPSCreg ( 3099 )  UKSCB ( 0 )  RUCDR ( 0 )

Stem cell name  Stem cell type

Cell grade  Produced by

Provider/ distributor  Reference publication

Gender of donor  Ethnicity of donor

Health status of donor  Source cell type

Organ/tissue of origin of source cell

# of rows/page

**What's New**

- 2019.12.01 Cell lines from SKIP database has been updated.
- 2019.10.01 Japanese version of the ICSCB has been released.

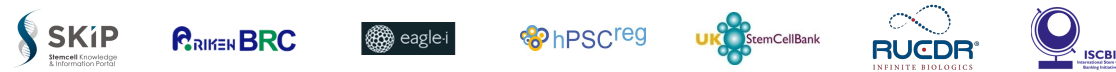

Items: 1 ~ 100 / 15656

| Data source  | Source cell                      |                |            |                |                       |                                                     |                                              |                    |                        |                  |                  |                                       |
|--------------|----------------------------------|----------------|------------|----------------|-----------------------|-----------------------------------------------------|----------------------------------------------|--------------------|------------------------|------------------|------------------|---------------------------------------|
|              | Stem cell production             |                |            |                |                       |                                                     |                                              |                    |                        |                  |                  | Source cell identification            |
|              | Stem cell general identification |                |            |                |                       |                                                     | Donor identification                         |                    |                        |                  | Source cell type |                                       |
| Stem cell ID | Stem cell name                   | Stem cell type | Cell grade | Produced by    | Provider/ distributor | Reference publication                               | Gender of donor                              | Ethnicity of donor | Health status of donor | Source cell type |                  | Organ/tissue of origin of source cell |
| SKIP         | SKIP000001                       | 201B7          | iPS Cell   | Research Grade | Yamanaka Shinya       | Center for iPS Cell Research and Application, Kyoto | 18035408<br>23300777<br>27073925<br>27161380 | Female             | Caucasian              |                  |                  | Skin                                  |
| SKIP         | SKIP000002                       | 253G1          | iPS Cell   |                | Yamanaka Shinya       | Center for iPS Cell Research and Application, Kyoto |                                              | Female             | Caucasian              |                  |                  | Skin                                  |
| SKIP         | SKIP000003                       | iPS-TIG107 3f1 | iPS Cell   |                | Yamanaka Shinya       | Center for iPS Cell Research and Application, Kyoto | 18035408                                     | Female             | Asian                  |                  |                  | Skin                                  |
| SKIP         | SKIP000004                       | iPS-TIG107 4f1 | iPS Cell   |                | Yamanaka Shinya       | Center for iPS Cell Research and Application, Kyoto | 18035408                                     | Female             | Asian                  |                  |                  | Skin                                  |

Fig2 Pie chart

**A**

**Stem cell type**

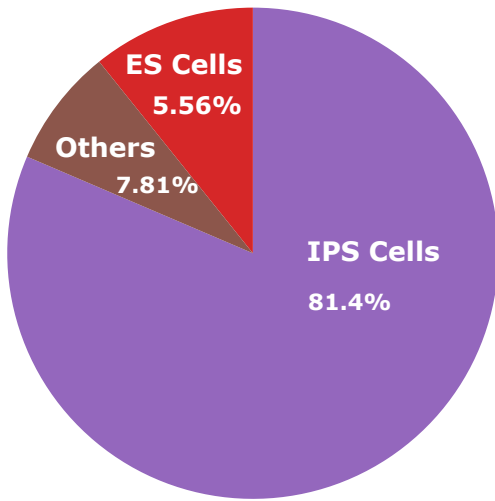

**B**

**Health status of donor**

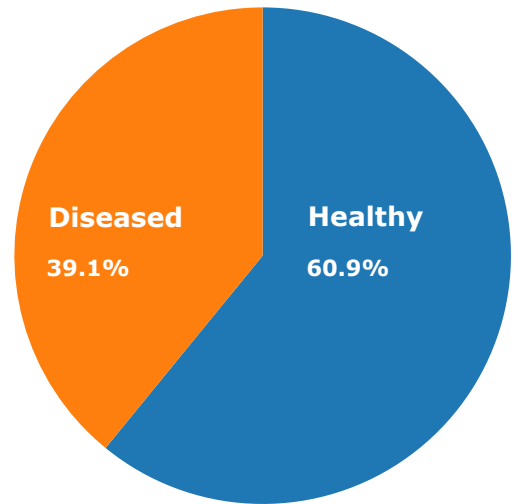

**C**

**Country\***

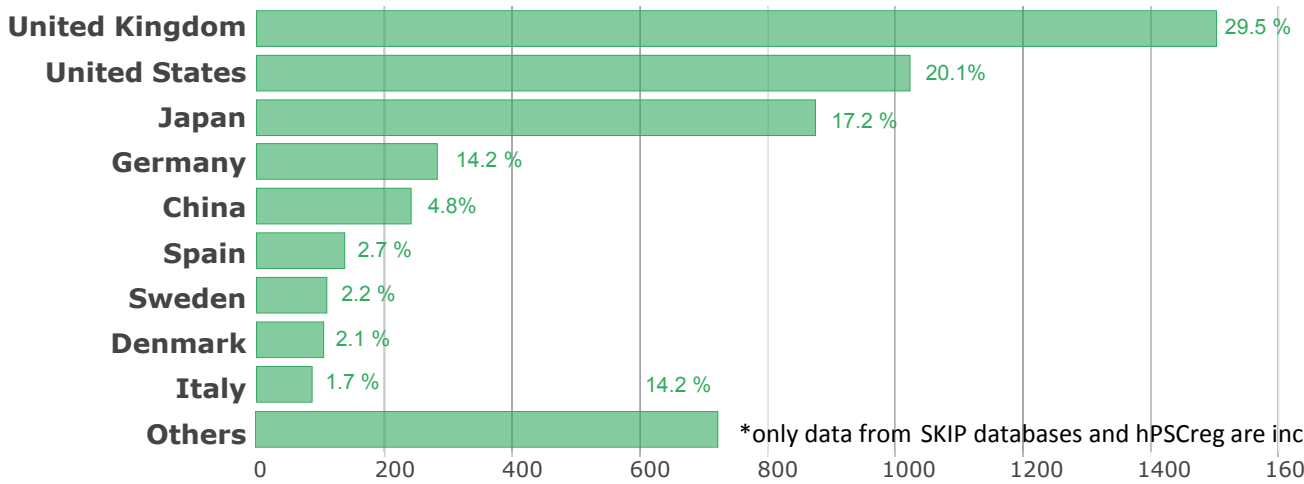

\*only data from SKIP databases and hPSCreg are included

**Cell line count**

**D**

**Disease/Disorder**

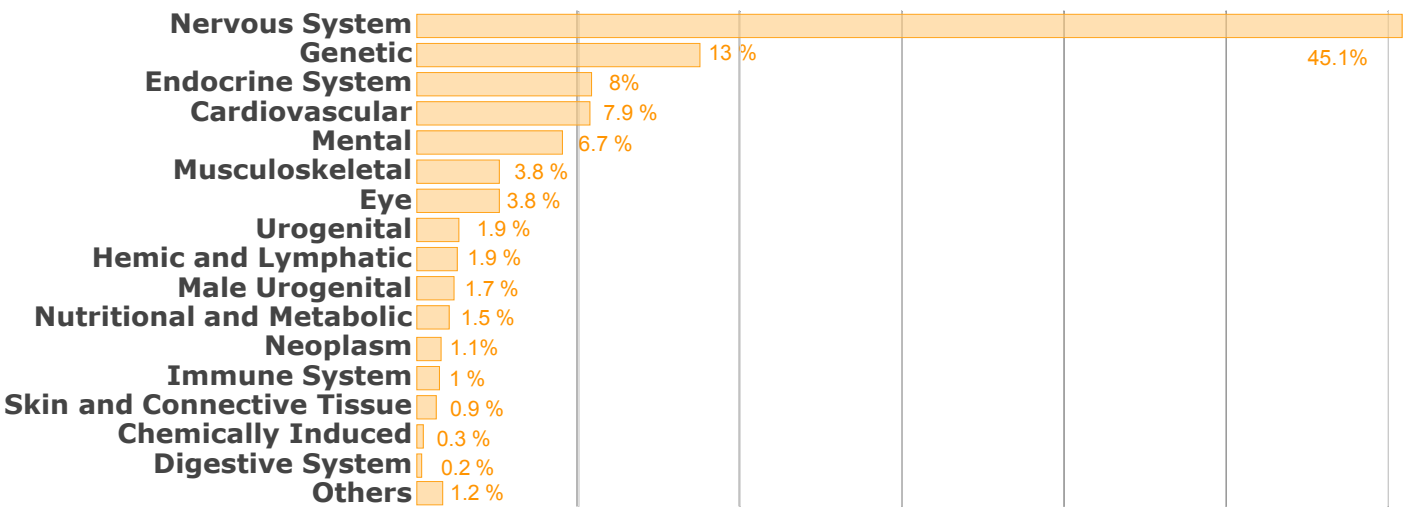

As of March 26, 2020

**Disease count**

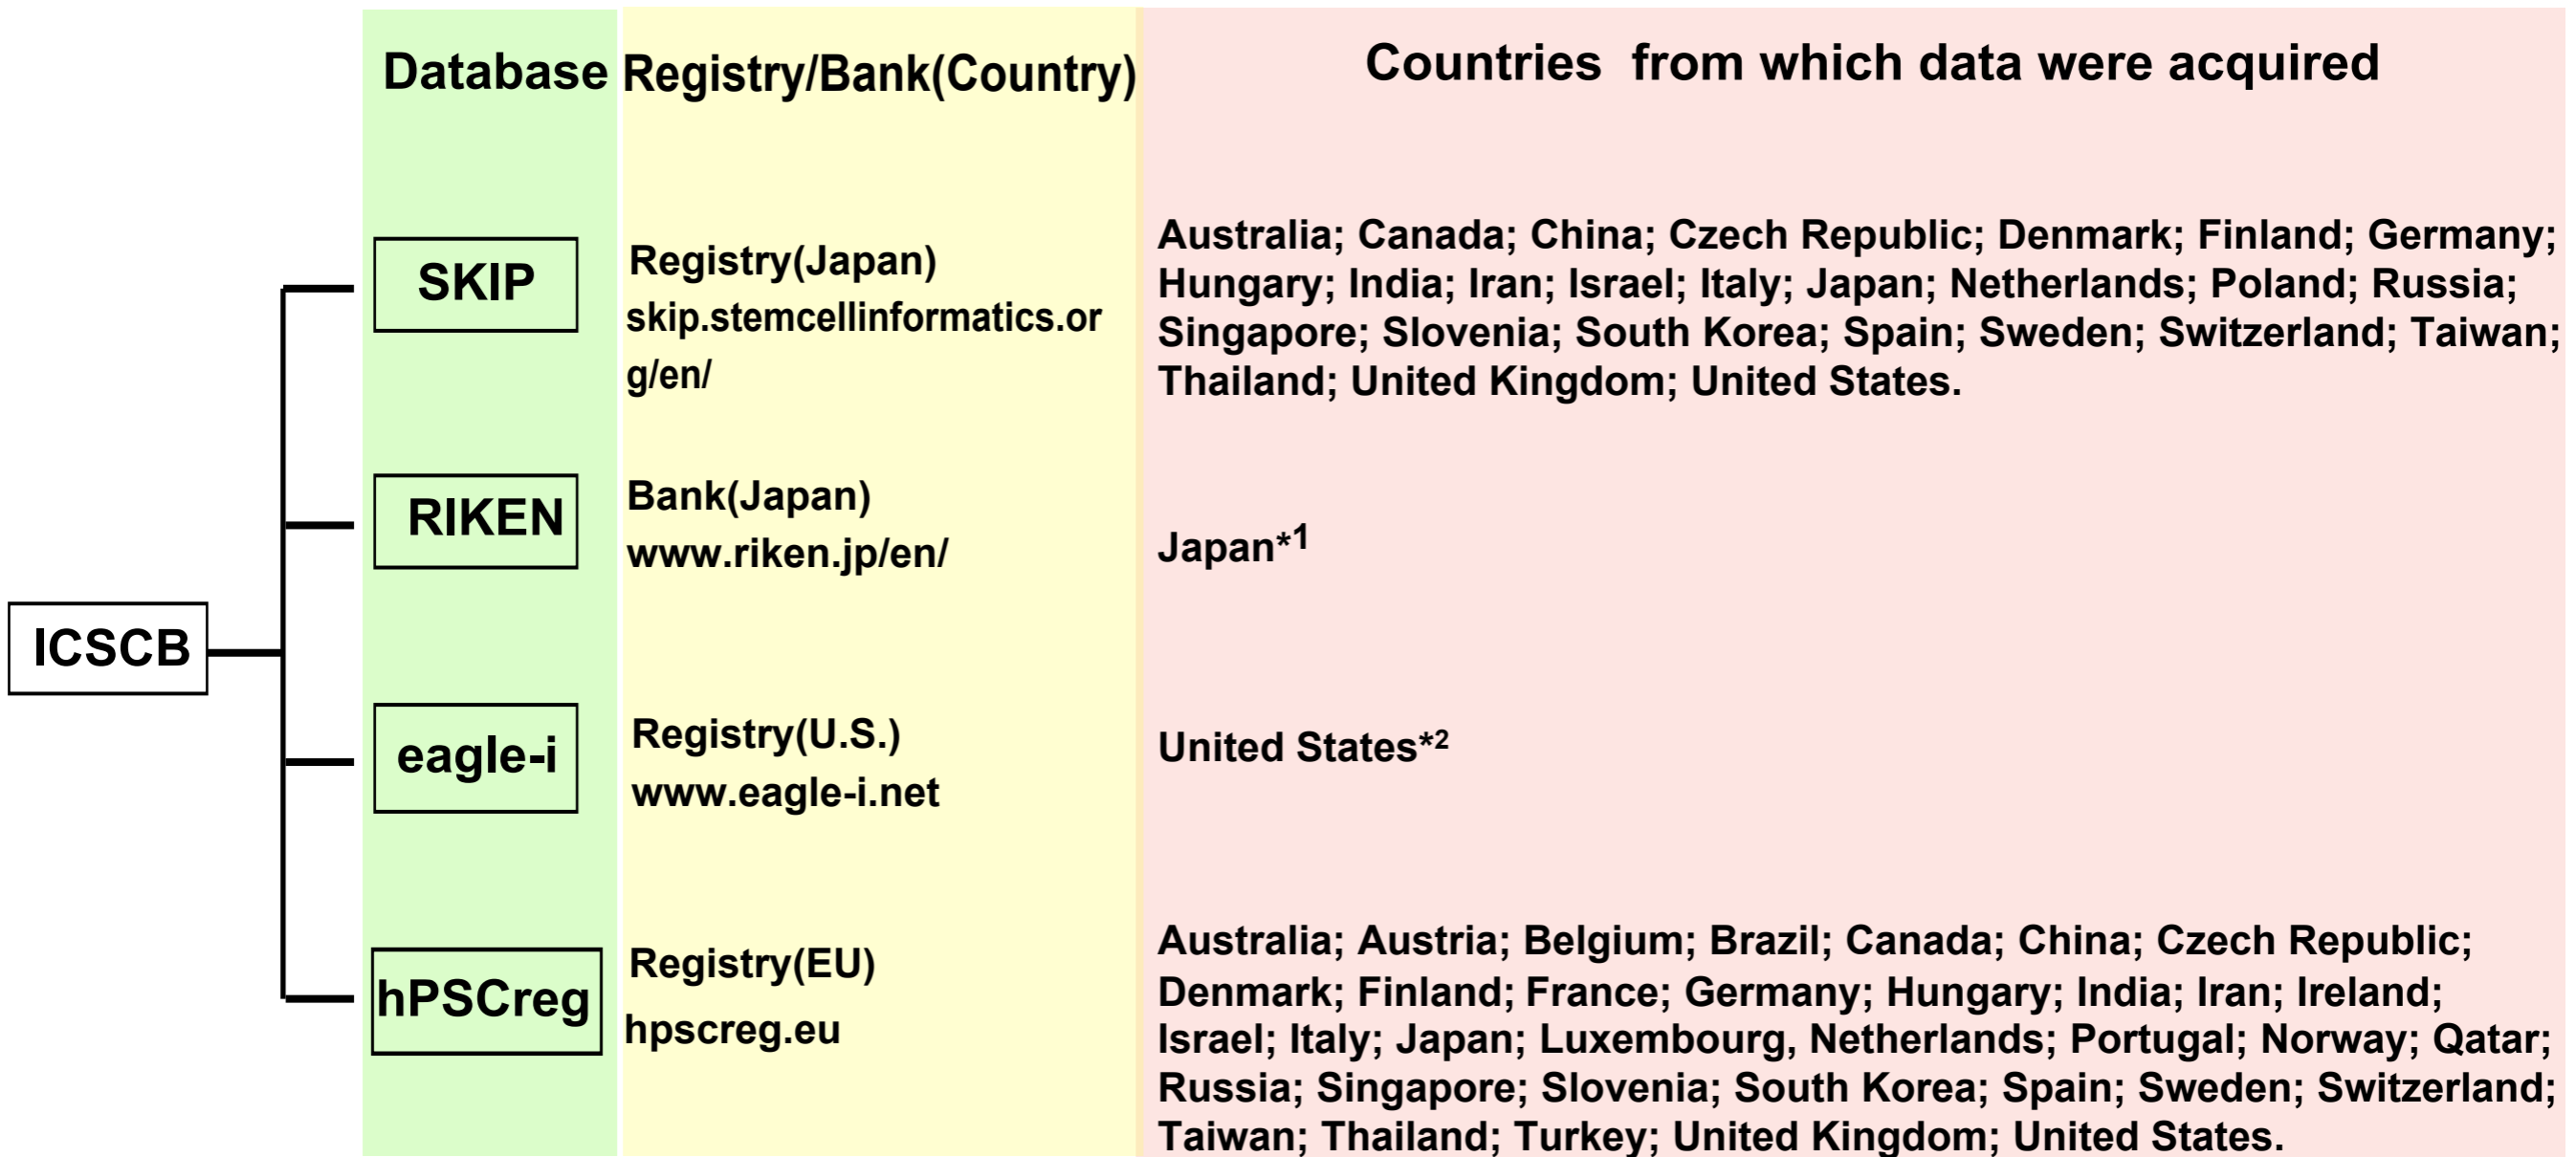

1. Related organization list: <https://www.amed.go.jp/content/000043772.pdf>  
 2. Participating institutions: <https://www.eagle-i.net/about/participating-institutions/>

Fig4 Workflow

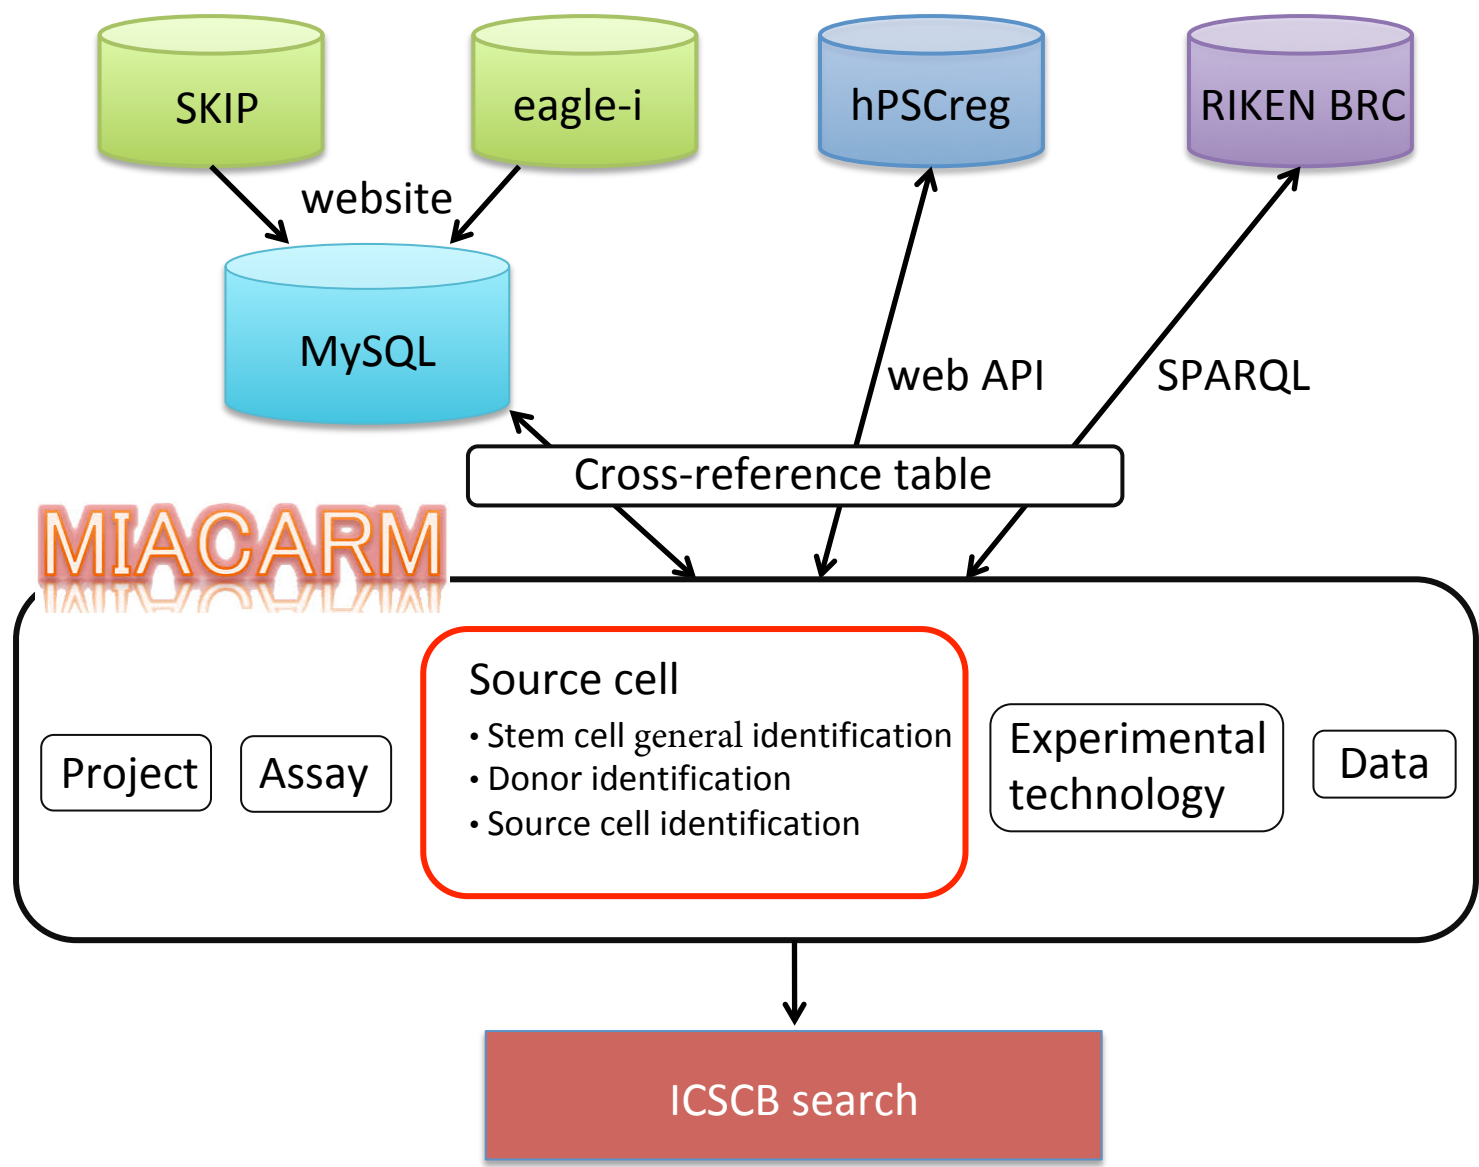

A

## Keyword search

## SKIP

cell id  
 stemcell\_id  
 cell line name  
 research grade  
 establisher name  
 establisher organization  
 pubmed ID  
 donor sex  
 donor race  
 disease name  
 cell type  
 organ/tissue of origin of source cell  
 in vivo differentiation assay  
 in vitro differentiation  
 cell morphology  
 pluripotent marker  
 karyotype assay  
 CNV detail  
 remaining vector detection test assay  
 whole genome detail  
 stem cell transcriptome analysis detail  
 epigenetics detail

## eagle-i

cell id  
 cell line label  
 cell line provider  
 sex  
 ethnicity  
 diagnosed disease  
 cell line type  
 cell line URL

## hPSCreg

source organism  
 race  
 cell lineage  
 health status  
 shogoin cell id  
 stem cell id  
 stem cell name  
 produced by  
 distributor  
 publication  
 gender  
 race  
 health status  
 source cell type  
 source cell description  
 origin of source cell

## Riken BRC

cell name  
 cell ID  
 description  
 original website  
 originator  
 depositor  
 taxon  
 depiction  
 common name  
 cell grouping  
 reference  
 derived from  
 gender  
 race  
 country  
 disease  
 age

B

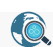

Integrated Collection of Stem Cell Bank data by MIACARM

| Data source | Source cell                      |                |                |                |                  |                                                                |                                                       |                      |                    |                        |                            |                                       |
|-------------|----------------------------------|----------------|----------------|----------------|------------------|----------------------------------------------------------------|-------------------------------------------------------|----------------------|--------------------|------------------------|----------------------------|---------------------------------------|
|             | Stem cell production             |                |                |                |                  |                                                                |                                                       |                      |                    |                        |                            |                                       |
|             | Stem cell general identification |                |                |                |                  |                                                                |                                                       | Donor identification |                    |                        | Source cell identification |                                       |
|             | Stem cell ID                     | Stem cell name | Stem cell type | Cell grade     | Produced by      | Provider/distributor                                           | Reference publication                                 | Gender of donor      | Ethnicity of donor | Health status of donor | Source cell type           | Organ/tissue of origin of source cell |
| SKIP        | SKIP000001                       | 201B7          | iPS Cell       | Research Grade | Yamanaka Shinya. | Center for iPS Cell Research and Application, Kyoto University | 18035408 --<br>23300777 --<br>27073925 --<br>27161380 | Female               | Caucasian          |                        |                            | Skin                                  |

| B/R* | Stem cell bank or registry                   | Country        | Website                                                                                                     | Number of cell lines |
|------|----------------------------------------------|----------------|-------------------------------------------------------------------------------------------------------------|----------------------|
| B    | BLCB                                         | Spain          | <a href="http://www.cmrb.eu/">http://www.cmrb.eu/</a>                                                       | 79                   |
| R    | hPSCreg                                      | Germany        | <a href="https://hpscereg.eu/">https://hpscereg.eu/</a>                                                     | 3099                 |
| R    | HipSci                                       | United Kingdom | <a href="http://www.hipsci.org/">http://www.hipsci.org/</a>                                                 | 799                  |
| B    | U.K. Stem Cell Bank                          | United Kingdom | <a href="https://www.nibsc.org/">https://www.nibsc.org/</a>                                                 | 36                   |
| B    | EBiSC                                        | Germany        | <a href="https://ebisc.org/">https://ebisc.org/</a>                                                         | 897                  |
| B/R  | CIRM / FUJIFILM                              | United States  | <a href="https://fujifilmcdi.com/the-cirm-ipsc-bank/">https://fujifilmcdi.com/the-cirm-ipsc-bank/</a>       | 1545                 |
| B    | Harvard Stem Cell Institute                  | United States  | <a href="http://stemcelldistribution.harvard.edu/">http://stemcelldistribution.harvard.edu/</a>             | 40                   |
| B    | NYSCF                                        | United States  | <a href="https://nyscf.org/">https://nyscf.org/</a>                                                         | 63                   |
| B    | NINDS Human Cell and Data Repository         | United States  | <a href="https://bioq.nindsgenetics.org/">https://bioq.nindsgenetics.org/</a>                               | 377                  |
| B    | WiCell Research Institute                    | United States  | <a href="https://www.wicell.org/">https://www.wicell.org/</a>                                               | 1505                 |
| B/R  | eagle-i                                      | United States  | <a href="https://www.eagle-i.net/">https://www.eagle-i.net/</a>                                             | 3548                 |
| B/R  | RIKEN BRC                                    | Japan          | <a href="https://en.brc.riken.jp/">https://en.brc.riken.jp/</a>                                             | 3545                 |
| R    | SKIP                                         | Japan          | <a href="https://skip.stemcellinformatics.org/">https://skip.stemcellinformatics.org/</a>                   | 5615                 |
| B    | JCRB                                         | Japan          | <a href="https://cellbank.nibiohn.go.jp/">https://cellbank.nibiohn.go.jp/</a>                               | 16                   |
| B    | Taiwan Human Disease iPSC Service Consortium | Taiwan         | <a href="https://catalog.bcrc.firdi.org.tw/Welcome/">https://catalog.bcrc.firdi.org.tw/Welcome/</a>         | 89                   |
| B    | National Stem Cell Bank of Korea             | Korea          | <a href="http://kscri.nih.go.kr/nscb/en/kscri/index.do/">http://kscri.nih.go.kr/nscb/en/kscri/index.do/</a> | 172                  |

\* B, bank; R, registry

**Table 1. Stem cell banks and registries worldwide (as of March 26, 2020)**

| <b>MIACARM module</b>            | <b>ICSCB term</b>                     | <b>hPSCreg</b>        | <b>SKIP</b>                           | <b>RIKEN BRC</b> | <b>eagle-i</b>     |
|----------------------------------|---------------------------------------|-----------------------|---------------------------------------|------------------|--------------------|
| Stem cell general identification | Stem cell ID                          | stem cell id          | stem cell id                          | CellID           | cell line label    |
|                                  | Stem cell name                        | stem cell name        | cell line name                        | CellName         | cell line label    |
|                                  | Stem cell type                        | N.A.                  | cell type                             | cell grouping    | cell line type     |
|                                  | Cell grade                            | N.A.                  | research grade                        | N.A.             | N.A.               |
|                                  | Produced by                           | produced by           | establisher name                      | originator       | N.A.               |
|                                  | Provider/distributor                  | distributor           | establisher organization              | depositor        | cell line provider |
|                                  | Reference publication                 | publication           | pubmed ID                             | reference        | N.A.               |
| Donor identification             | Gender of donor                       | gender                | donor sex                             | gender           | sex                |
|                                  | Ethnicity of donor                    | race                  | donor race                            | race             | ethnicity          |
|                                  | Health status                         | health status         | disease name                          | disease          | diagnosed disease  |
| Source cell identification       | Source cell type                      | source cell type      | N.A.                                  | N.A.             | N.A.               |
|                                  | Organ/tissue of origin of source cell | origin of source cell | organ/tissue of origin of source cell | N.A.             | N.A.               |

N.A., not available.

**Table 2. Cross-reference table for integration of four databases according to MIACARM module (as of March 26, 2020).**



1 **SUPPLEMENTAL INFORMATION**

2 **Integrated Collection of Stem Cell Bank data, a**  
3 **data portal for standardized stem cell**  
4 **information**

5

6 **Authors**

7 Ying Chen, Kunie Sakurai, Sumihiro Maeda, Tohru Masui, Hideyuki Okano, Johannes

8 Dewender, Stefanie Seltsmann, Andreas Kurtz, Hiroshi Masuya, Yukio Nakamura,

9 Michael Sheldon, Juliane Schneider, Glyn N. Stacey, Yulia Panina, and Wataru

10 Fujibuchi

11 **SUPPLEMENTAL FIGURES**

12 **Fig S1. Details of cell line types collected by eagle-i, RIKEN BRC, SKIP, and**

13 **hPSCreg** (as of March 26, 2020). (A) eagle-i, (B) RIKEN BRC, (C) SKIP, and (D)

14 hPSCreg

15

16 **Fig S2. Details of countries that have established cell lines in hPSCreg** (as of March

17 26, 2020).

18

19 **Fig S3. Details of countries that have established cell lines in SKIP** (as of March 26,

20 2020).

21 **Fig. S1**

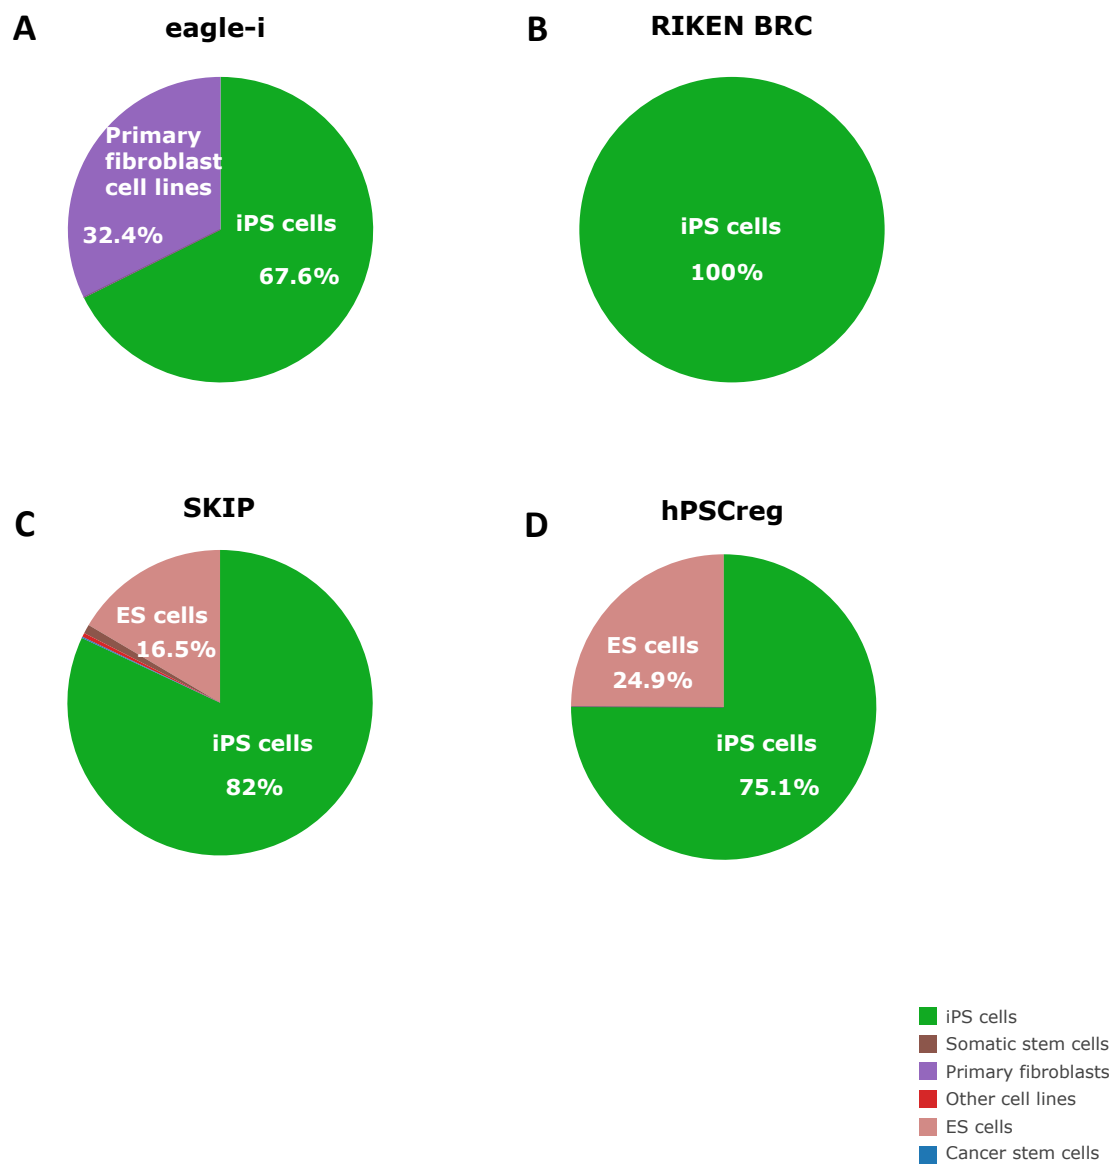

22

23 **Fig. S2**

### hPSCreg

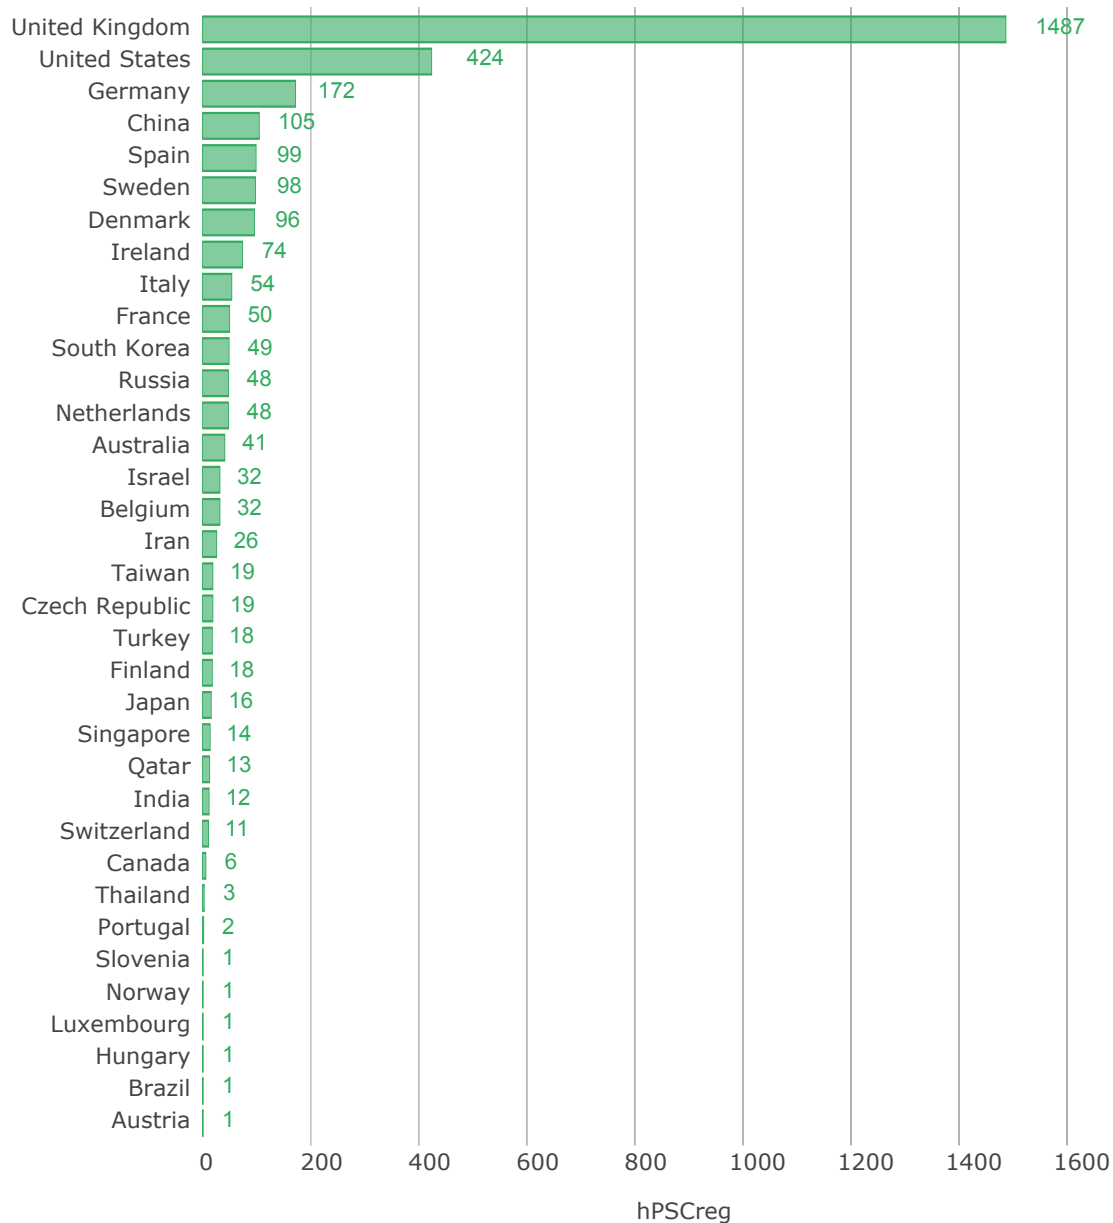

24

25 **Fig. S3**

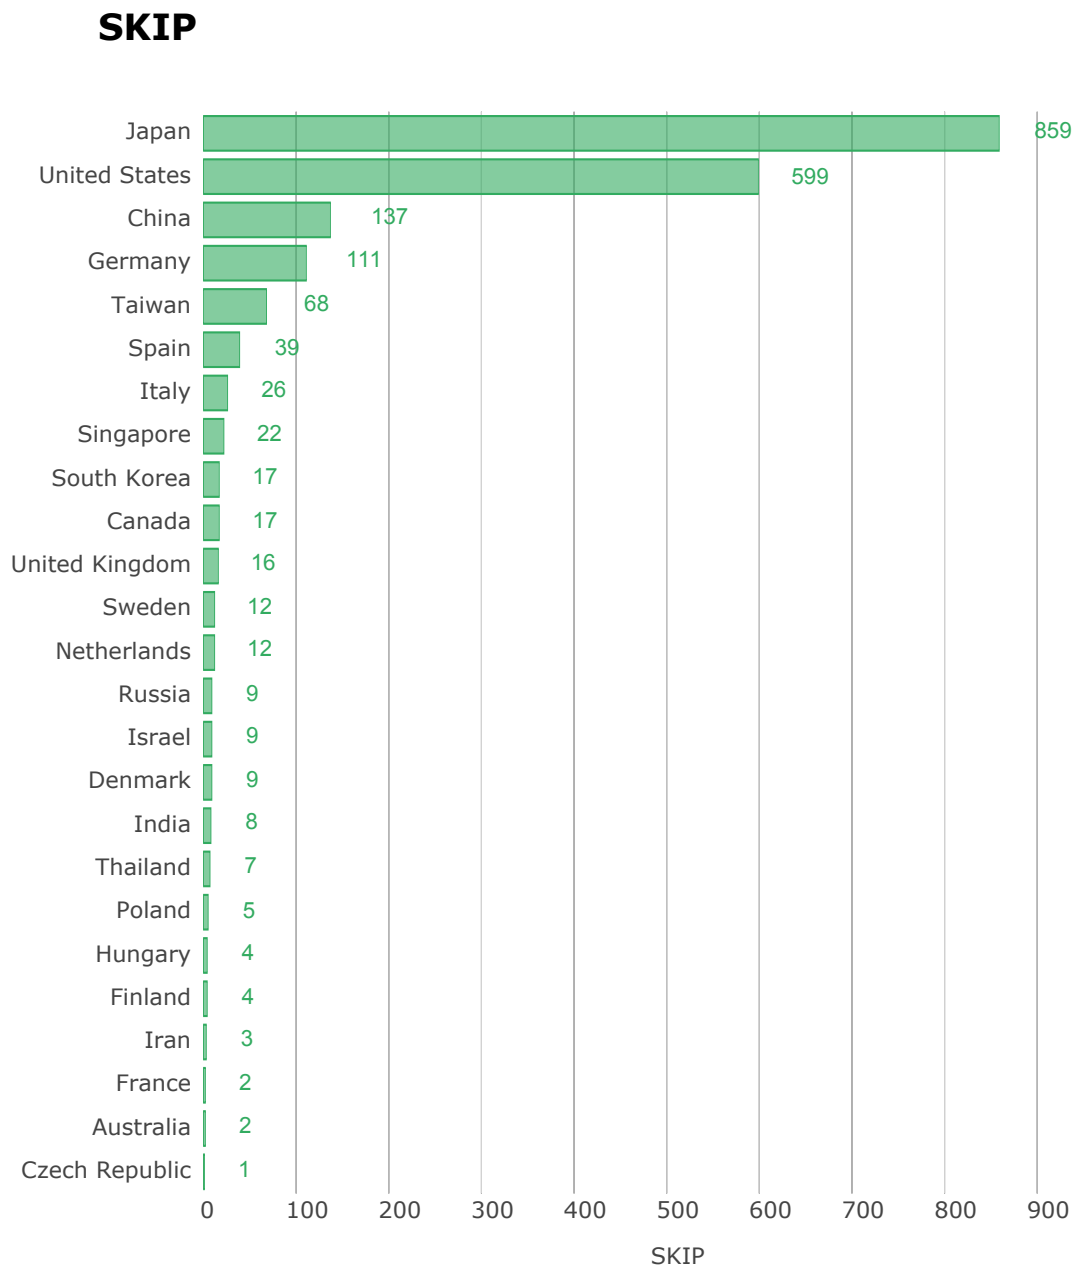

26

27 **SUPPLEMENTAL TABLES**

28 **Table S1. Related to Figure 5: List of full information of ICSCB as of March 26,**  
29 **2020.**

30

31 **Table S2. Related to Figure 5A and Figure S1: List of cell line types across all four**  
32 **databases (as of March 26, 2020).**

33

34 **Table S3. Related to Figure 5B: Statistics of healthy/diseased cell lines in ICSCB**  
35 **(as of March 26, 2020).**

36

37 **Table S4. Related to Figure 5C: Statistics of cell line types based on country (as of**  
38 **March 26, 2020).**

39

40 **Table S5. Related to Figure 5D: Statistics of diseased cell lines based on disease**  
41 **category (as of March 26, 2020).**

## 42 **EXPERIMENTAL PROCEDURES**

### 43 **Generation of Fig. 1**

44 Among all the databases, SKIP and hPSCreg provided details of countries from which  
45 data were acquired. For SKIP, this information was provided on its homepage  
46 ([skip.stemcellinformatics.org/en/](http://skip.stemcellinformatics.org/en/)). For hPSCreg, country information for every cell line  
47 could be accessed from its homepage (<https://hpscereg.eu/>) by clicking “find by  
48 location”.

49

### 50 **Generation of Fig. 5**

51 Full information data were directly downloaded from ICSCB results page (**Table S1**)  
52 and filtered according to the following criteria: (A) stem cell type (**Table S2**); (B)  
53 health/disease status (**Table S3**); (C) country (**Table S4**); and (D) disease (**Table S5**).  
54 Disease categories were determined by search results with keywords under the “Disease  
55 Category” in NCBI MeSH page (<https://www.ncbi.nlm.nih.gov/mesh>). For example,  
56 searching with keywords of “Parkinson disease” will lead to the MeSH term “Nervous

57 System Diseases” under the “Disease Category”. Pie charts and bar graphs were  
58 produced by R (graph.r) using the package “plotly”.



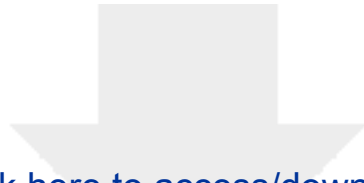

[Click here to access/download](#)

**Supplemental Movies and Spreadsheets**

**TableS1.200407.xlsx**

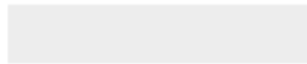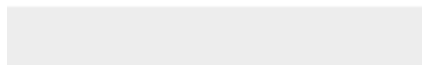

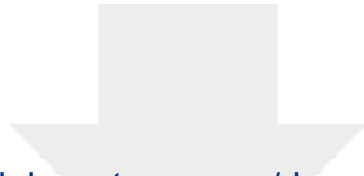

[Click here to access/download](#)

**Supplemental Movies and Spreadsheets**

**TableS2.200407.xlsx**

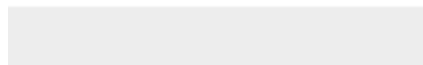



[Click here to access/download](#)

**Supplemental Movies and Spreadsheets**

**TableS3.200407.xlsx**

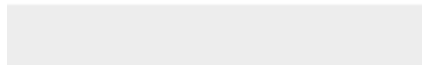



[Click here to access/download](#)

**Supplemental Movies and Spreadsheets**

**TableS4.200407.xlsx**





[Click here to access/download](#)

**Supplemental Movies and Spreadsheets**

**TableS5.200407.xlsx**



Source: https://www.biorxiv.org/content/biorxiv/early/2020/08/27/2020.08.26.263830.full.pdf
